# Supplementary material for: The number of nuclei in compacted embryos, assessed by optical coherence microscopy, is a non-invasive and robust marker of mouse embryo quality
Source: PubMed Central journal article supplement (PMC10978378; doi:10.1093/molehr/gaae012), 2024-02-24
Supplement: gaae012_supplementary_data.pdf [file gaae012_supplementary_data.pdf]

Supplementary Information

for

**The number of nuclei in compacted embryos, assessed by optical coherence microscopy,  
is a non-invasive and robust marker of mouse embryo quality**

by

Aleksandra Sobkowiak, Monika Fluks, Ewa Kosyl, Robert Milewski, Marcin Szpila, Szymon  
Tamborski, Maciej Szkulmowski, Anna Ajduk

**Contents:**

1. **Supplementary Fig. S1.** Relation between the number of cells assessed by optical coherence microscopy in E3.0 embryos and their subsequent ability to hatch and differentiate into properly formed outgrowths.
2. **Supplementary Table S1.** Details of embryo transfers for embryos imaged with optical coherence microscopy (OCM) and control embryos (CTRL).
3. **Supplementary Table S2.** Details of breeding experiments testing fertility of offspring derived from embryos imaged with optical coherence microscopy (OCM) and control embryos (CTRL).

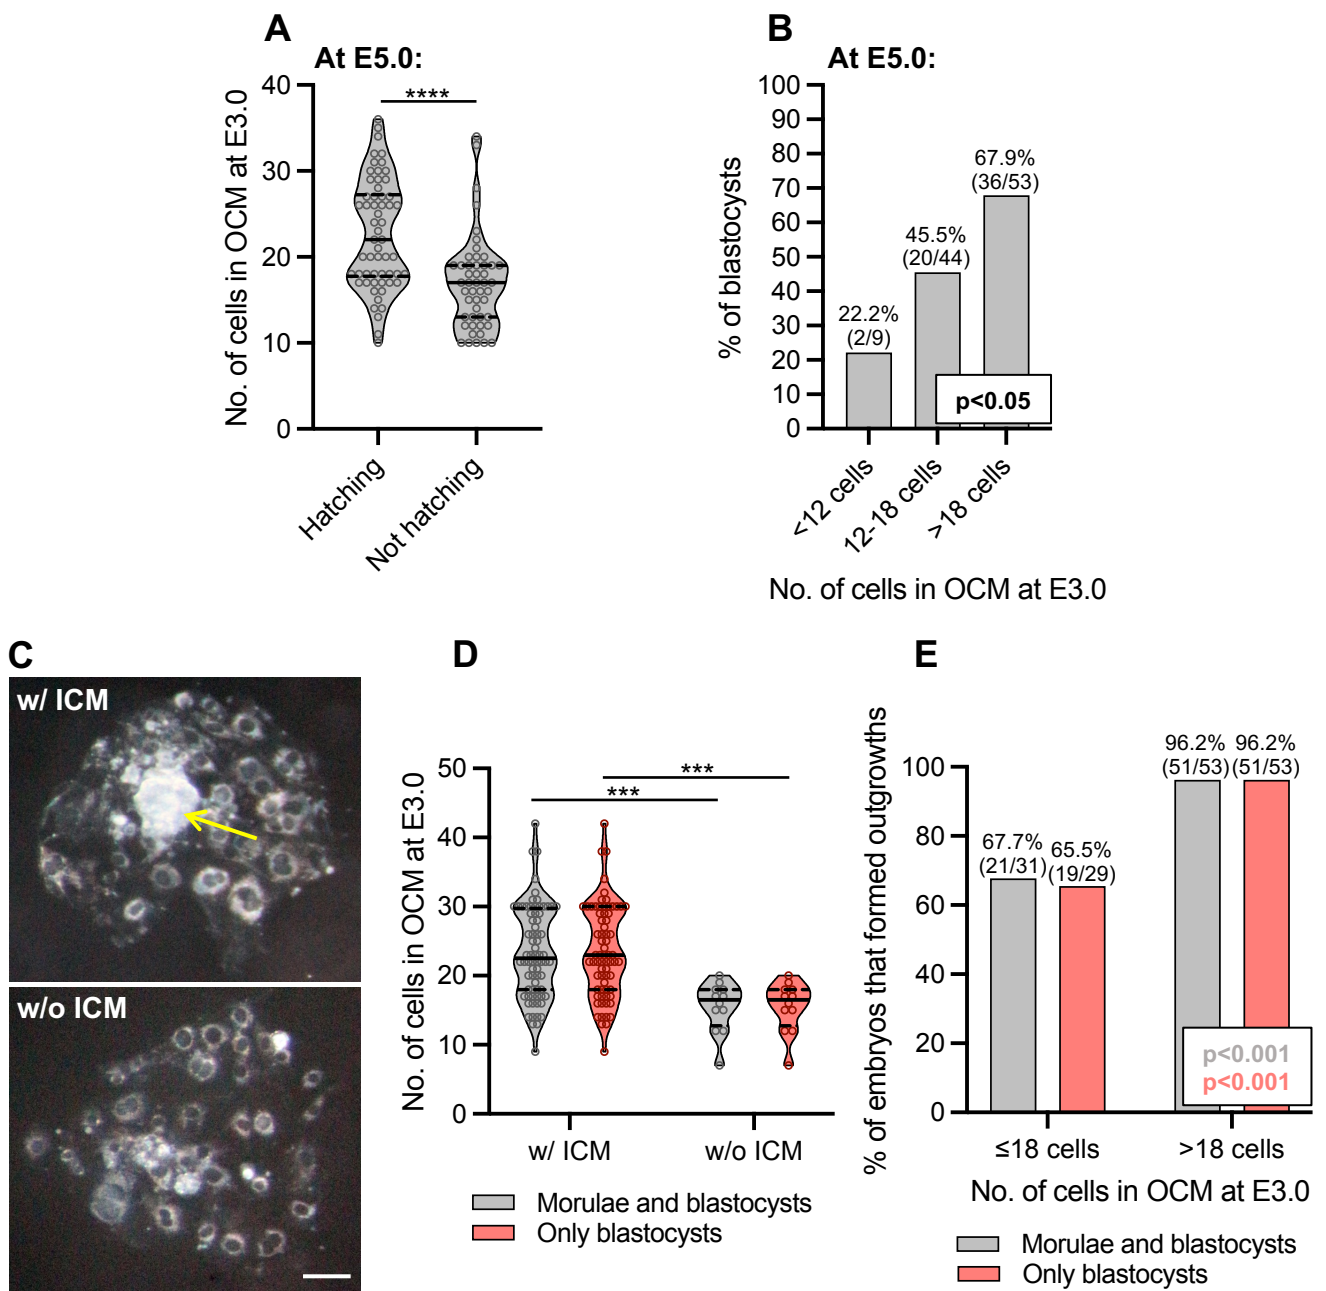

**Supplementary Fig. S1**

**Relation between the number of cells assessed by optical coherence microscopy in E3.0 embryos and their subsequent ability to hatch and differentiate into properly formed outgrowths.**

(A) Relation between the number of cells assessed by optical coherence microscopy (OCM) in E3.0 (72 hrs after onset of insemination) embryos and their ability to hatch by E5.0 (120 hrs after onset of insemination). Violin plots show distribution of the analysed data; the solid black line indicates median, the dashed black lines – 1<sup>st</sup> and 3<sup>rd</sup> quartile values; \*\*\*\* $p < 0.001$ . (B) Percentage of blastocysts hatching by E5.0 in relation to their cell number assessed by OCM at E3.0. (C) Representative images of outgrowths with and without inner cell mass (marked with an arrow). Scale bar 100  $\mu$ m. (D) Relation between the number of cells assessed by OCM in E3.0 embryos and their ability to form outgrowths with inner cell masses. Violin plots showing distribution of the analysed data; the solid black line indicates median, the dashed black lines – 1<sup>st</sup> and 3<sup>rd</sup> quartile values; \*\*\* $p < 0.001$ . (E) Percentage of embryos forming outgrowths with inner cell masses in relation to their cell number assessed by OCM at E3.0. (D, E) Embryos that were morulae or blastocysts on the day of plating for outgrowths (in grey) or only embryos that were blastocysts at that time (in red) were considered. 106 embryos (58 hatching and 48 not hatching) were analysed in (A, B) and 84 outgrowths (72 with inner cell masses and 12 without) in (D, E). ICM – inner cell mass.

**Supplementary Table S1.****Details of embryo transfers for embryos imaged with optical coherence microscopy (OCM) and control embryos (CTRL).**

| Recipient no. | No. of E4.0 embryos transferred (morulae and blastocysts) | No. of blastocysts transferred | % of blastocysts (among all transferred embryos) | No. of pups | Live birth rate (% of all transferred embryos) | Live birth rate (% of transferred blastocysts) |
|---------------|-----------------------------------------------------------|--------------------------------|--------------------------------------------------|-------------|------------------------------------------------|------------------------------------------------|
| OCM_1.1       | 9                                                         | 8                              | 88.9                                             | 5           | 55.6                                           | 62.5                                           |
| OCM_1.2       | 11                                                        | 6                              | 54.5                                             | 4           | 36.4                                           | 66.7                                           |
| OCM_2.1       | 12                                                        | 12                             | 100.0                                            | 0           | 0.0                                            | 0.0                                            |
| OCM_2.2       | 12                                                        | 12                             | 100.0                                            | 7           | 58.3                                           | 58.3                                           |
| OCM_3.1       | 10                                                        | 4                              | 40.0                                             | 0           | 0.0                                            | 0.0                                            |
| OCM_3.2       | 8                                                         | 5                              | 62.5                                             | 2           | 25.0                                           | 40.0                                           |
| OCM_4.1       | 5                                                         | 2                              | 40.0                                             | 1           | 20.0                                           | 50.0                                           |
| OCM_5.1       | 14                                                        | 12                             | 85.7                                             | 1           | 7.1                                            | 8.3                                            |
| OCM_5.2       | 15                                                        | 15                             | 100.0                                            | 6           | 40.0                                           | 40.0                                           |
| OCM_6.1       | 12                                                        | 12                             | 100.0                                            | 7           | 58.3                                           | 58.3                                           |
| MEAN          | 10.8                                                      | 8.8                            | 77.2                                             | 3.3         | 30.1                                           | 38.4                                           |
| SD            | 2.9                                                       | 4.4                            | 25.4                                             | 2.8         | 23.2                                           | 26.2                                           |
| CTRL_1.1      | 9                                                         | 5                              | 55.6                                             | 0           | 0.0                                            | 0.0                                            |
| CTRL_1.2      | 10                                                        | 6                              | 60.0                                             | 5           | 50.0                                           | 83.3                                           |
| CTRL_2.1      | 11                                                        | 11                             | 100.0                                            | 1           | 9.1                                            | 9.1                                            |
| CTRL_2.2      | 13                                                        | 13                             | 100.0                                            | 4           | 30.8                                           | 30.8                                           |
| CTRL_3.1      | 17                                                        | 3                              | 76.5                                             | 5           | 29.4                                           | 38.5                                           |
| CTRL_4.1      | 6                                                         | 1                              | 16.7                                             | 0           | 0.0                                            | 0.0                                            |
| CTRL_5.1      | 14                                                        | 13                             | 92.9                                             | 0           | 0.0                                            | 0.0                                            |
| CTRL_5.2      | 15                                                        | 13                             | 86.7                                             | 0           | 0.0                                            | 0.0                                            |
| CTRL_6.1      | 12                                                        | 12                             | 100.0                                            | 6           | 50.0                                           | 50.0                                           |
| CTRL_6.2      | 12                                                        | 12                             | 100.0                                            | 7           | 58.3                                           | 58.3                                           |
| CTRL_7.1      | 12                                                        | 12                             | 100.0                                            | 6           | 50.0                                           | 50.0                                           |
| CTRL_7.2      | 12                                                        | 12                             | 100.0                                            | 7           | 58.3                                           | 58.3                                           |
| MEAN          | 11.9                                                      | 10.3                           | 82.4                                             | 3.4         | 28.0                                           | 31.5                                           |
| SD            | 2.8                                                       | 4.0                            | 26.2                                             | 3.0         | 24.9                                           | 29.1                                           |

E4.0 – 96 hrs after onset of insemination

**Supplementary Table S2****Details of breeding experiments testing fertility of offspring derived from embryos imaged with optical coherence microscopy (OCM) and control embryos (CTRL).**

| Tested female no. | No. of pups              |                          |                          |                          | Total |
|-------------------|--------------------------|--------------------------|--------------------------|--------------------------|-------|
|                   | 1 <sup>st</sup> delivery | 2 <sup>nd</sup> delivery | 3 <sup>rd</sup> delivery | 4 <sup>th</sup> delivery |       |
| OCM_Fe1           | 5                        | 7                        | 3                        | -                        | 15    |
| OCM_Fe2           | 7                        | 10                       | 8                        | -                        | 25    |
| OCM_Fe3           | 8                        | 7                        | 11                       | -                        | 26    |
| OCM_Fe4           | 8                        | 9                        | 10                       | 10                       | 37    |
| OCM_Fe5           | 8                        | 11                       | 10                       | 14                       | 43    |
| OCM_Fe6           | 10                       | 9                        | 8                        | 12                       | 39    |
| OCM_Fe7           | 9                        | 9                        | 8                        | 11                       | 37    |
| OCM_Fe8           | 7                        | 7                        | -                        | -                        | 14    |
| MEAN              | 7.8                      | 8.6                      | 8.3                      | 11.8                     | 29.5  |
| SD                | 1.5                      | 1.5                      | 2.6                      | 1.7                      | 11.1  |

| Tested male no. | No. of pups              |                          |                          |                          | Total |
|-----------------|--------------------------|--------------------------|--------------------------|--------------------------|-------|
|                 | 1 <sup>st</sup> delivery | 2 <sup>nd</sup> delivery | 3 <sup>rd</sup> delivery | 4 <sup>th</sup> delivery |       |
| OCM_Ma1         | 9                        | 8                        | 10                       | -                        | 27    |
| OCM_Ma2         | 7                        | 9                        | 5                        | 7                        | 28    |
| OCM_Ma3         | 10                       | 3                        | 9                        | -                        | 22    |
| OCM_Ma4         | 9                        | 9                        | 9                        | 7                        | 34    |
| OCM_Ma5         | 9                        | 10                       | -                        | -                        | 19    |
| OCM_Ma6         | 10                       | 12                       | 7                        | -                        | 29    |
| OCM_Ma7         | 2                        | 1                        | 1                        | -                        | 4     |
| OCM_Ma8         | 11                       | 11                       | 10                       | 11                       | 43    |
| OCM_Ma9         | 9                        | 2                        | 1                        | 5                        | 17    |
| MEAN            | 8.4                      | 7.2                      | 6.5                      | 7.5                      | 24.8  |
| SD              | 2.7                      | 4.1                      | 3.8                      | 2.5                      | 11.1  |

| Tested female no. | No. of pups              |                          |                          |                          | Total |
|-------------------|--------------------------|--------------------------|--------------------------|--------------------------|-------|
|                   | 1 <sup>st</sup> delivery | 2 <sup>nd</sup> delivery | 3 <sup>rd</sup> delivery | 4 <sup>th</sup> delivery |       |
| CTRL_Fe1          | 8                        | 10                       | 10                       | 10                       | 38    |
| CTRL_Fe1          | 10                       | 9                        | 10                       | 9                        | 38    |
| CTRL_Fe2          | 7                        | 7                        | 10                       | 6                        | 30    |
| CTRL_Fe4          | 9                        | 11                       | 10                       | -                        | 30    |
| CTRL_Fe5          | 10                       | 2                        | 9                        | -                        | 21    |
| CTRL_Fe6          | 18                       | 9                        | 6                        | 10                       | 33    |
| CTRL_Fe7          | 10                       | 13                       | 10                       | 12                       | 45    |
| MEAN              | 8.9                      | 8.7                      | 9.3                      | 9.4                      | 33.6  |
| SD                | 1.2                      | 3.5                      | 1.5                      | 2.2                      | 7.7   |

| Tested male no. | No. of pups              |                          |                          |                          | Total |
|-----------------|--------------------------|--------------------------|--------------------------|--------------------------|-------|
|                 | 1 <sup>st</sup> delivery | 2 <sup>nd</sup> delivery | 3 <sup>rd</sup> delivery | 4 <sup>th</sup> delivery |       |
| CTRL_Ma1        | 9                        | 10                       | 10                       | 9                        | 38    |
| CTRL_Ma2        | 8                        | 9                        | 12                       | -                        | 29    |
| CTRL_Ma3        | 10                       | 9                        | -                        | -                        | 19    |
| CTRL_Ma4        | 8                        | 9                        | 9                        | 8                        | 34    |
| OCM_Ma5         | 8                        | 7                        | 10                       | -                        | 25    |
| OCM_Ma6         | 8                        | 7                        | 10                       | 11                       | 36    |
| MEAN            | 8.5                      | 8.5                      | 10.2                     | 9.3                      | 30.2  |
| SD              | 0.8                      | 1.2                      | 1.1                      | 1.5                      | 7.3   |
